# Supplementary material for: Foliar concentrations of volunteer willows growing on polluted sediment-derived sites versus sites with baseline contamination levelsElectronic supplementary information (ESI) available: results for fluctuating asymmetry in the leaves of S. cinerea (ESI1, Table 1S) and forest floor quality (ESI2, Table 2S). See http://www.rsc.org/suppdata/em/b3/b314917j/
Source: Royal Society of Chemistry journal article supplement (doi:10.1039/b314917j), 2004-01-01
Supplement: b314917j.doc [file b314917j.doc]

### Foliar concentrations of volunteer willows growing on polluted sediment-derived sites versus sites with baseline contamination levels

Bart Vandecasteele, Paul Quataert, Bruno De Vos, Filip M.G. Tack, Bart Muys

ESI1. Fluctuating asymmetry in the leaves of *S. cinerea*

For all sampled *S. cinerea* with exception of the trees sampled at the DSL7 site, leaf fluctuating asymmetry was used as a potential early stress indicator. The fifth leaf of five vegetative shoots were collected per *S. cinerea* tree, and dried between filter paper sheets. Thus 4x5 leaves were collected per plot. Leaf area was scanned with a SONY powerHAD DXP-950P Camera, and images were digitally separated in the left (WL) and right (WR) wing using the midrib as a boundary. The area of each wing was measured with Leica Quips software. Leaf fluctuating asymmetry was calculated after standardisation towards leaf area according to the formula: fluctuating asymmetry = 2xAbs(WR-WL)/(WR+WL)40. Three variables were selected for further analysis: the average fluctuating asymmetry per tree (FAmean), the maximum fluctuating asymmetry per tree (FAmax) and maximum leaf area measured per tree (LAmax).

Data on leaf fluctuating asymmetry as a potential stress indicator were compared with foliar concentrations for the measured elements and DA:DW, but no significant correlation with any of the foliar properties was found when applying stepwise linear regression. Both for FAmax, FAmean and LAmax, used as stress indicators and growth parameters, no differences between sites were detected by ANOVA. Results for FAmean and LAmax are shown in Table 1S.

**Table 1S** Average foliar characteristics for *S. cinerea* and *S. alba*. Number of replicates (n) is indicated on the first row (ALLUV: alluvial soils, OSZ: contaminated overbank sedimentation zones, DSL: dredged sediment landfills, FTM: freshwater tidal marshes)

ESI2. Forest floor quality

On DSL and ISL sites not submerged during the winter, forest floor quality during decomposition was screened. On five plots (D3 & D4 (1 plot under *S. viminalis* and 1 plot under *S. alba*), D5, D6 and D7) forest floor samples were collected in week 5 and week 13 of the year 2002 at five subplots on a surface of 0.5 x 0.5 m. 15 plots on an ISL with volunteer willow vegetation were sampled identically (site indicated as ISL3 on Fig. 1). Twigs, bark fragments and other non-foliar materials were picked out to retain only leaf and herbaceous litter. Samples were dried in a ventilated oven at 40° C, weighed and mechanically ground (Pulverisette 14, Fritsch, Idar-Oberstein, Germany) and stored in dark glass vials before analysis. Two-way ANOVA with factors ‘period’ and ‘plot’ was used for comparison between foliar Cd and Zn concentrations in week 42 and forest floor concentrations in week 5 and 13 for the D3, D4, D5, D6 and D7 plots. Cd concentrations were log10-transformed.

For the D3, D4, D5, D6 and D7 plots, Cd and Zn foliar data for week 42 were compared with forest floor concentrations for samples collected in week 5 (February) and week 13 (April). For Cd, no influence of sampling time was detected, while influence of the plot on the results was highly significant (p < 0.001). For Zn, there was interaction between the factors ‘plot’ and ‘sampling time’( p = 0.003) (Table 2S). Reference concentrations for forest floor on the ISL3 site were 3.8  1.1 mg Cd kg-1 DW and 346  87 mg Zn kg-1 DW in week 5 and 3.6  1.2 mg Cd kg-1 DW and 332  70 mg Zn kg-1 DW in week 13. No significant difference between the two sampling periods was detected with pair-wise t-test comparison for both Cd and Zn concentrations in the forest floor samples in the reference situation.

In upland situations, foliar Cd and Zn concentrations at the end of the growing season were comparable with forest floor concentrations in week 5 and week 13 (Table 2S), indicating that foliage composition remains relatively constant during decomposition. On the average, forest floor Cd and Zn concentrations were respectively 5 and 4.5 times higher than in willow forests with baseline soil contamination levels. Forest floor concentrations are substantially lower than values reported by Martin and Bullock41 for Oak woodlands near zinc smelters with extreme litter accumulation; litter concentrations measured by Martin and Bullock41 were 39-112 mg Cd kg-1 DW and 1900-3500 mg Zn kg-1 DW. Grelle *et al.*42 observed thick, undecomposed litter layers for the most polluted sites near a smelter with litter concentrations of 300 mg Cdkg-1 DW, 30000 mg Zn kg-1 DW and 5000 mg Pb kg-1 DW.

**Table 2S** Comparison between foliar concentrations (mg kg-1 DW) at the end of the growing season (week 42) and forest floor concentrations in week 5 (February) and week 13 (April) for 5 plots on dredged sediment landfills. Number of replicates is indicated in parentheses

References

1. M.V. Kozlov, B.J. Wilsey, J. Koricheva and E. Haukioja, *J. Appl. Ecol.*, 1996, **33**, 1489.
2. M.H. Martin and R.J. Bullock, in *Toxic Metals in Soil-Plant Systems*, ed. S.M. Ross, John Wiley, Chichester, 1994, pp 327-366.
3. C. Grelle, M.C. Fabre, A. Lepêtre and M. Descamps, *Eur. J. Soil Sci.*, 2000, **51**, 425.
